# Supplementary material for: Generation and Feasibility Assessment of a New Vehicle for Cell-Based Therapy for Treating Corneal Endothelial Dysfunction
Source: PubMed Central journal article supplement (PMC4927169; doi:10.1371/journal.pone.0158427), 2016-06-29
Supplement: pone.0158427.s002.pdf [file pone.0158427.s002.pdf]

S1 Table. Composition table of cell therapy vehicle (CTV)

|                                                                     |                               |
|---------------------------------------------------------------------|-------------------------------|
| Inorganic salts                                                     | Vitamins                      |
| $(\text{NH}_4)_6\text{MO}_7\text{O}_{24} \cdot 4\text{H}_2\text{O}$ | Ascorbic acid 2-phosphate 3Na |
| $\text{CaCl}_2$                                                     | D-Biotin                      |
| $\text{CuSO}_4 \cdot 5\text{H}_2\text{O}$                           | Choline Chloride              |
| $\text{FeSO}_4 \cdot 7\text{H}_2\text{O}$                           | Folic acid                    |
| $\text{MgSO}_4$                                                     | Folinic acid • Ca             |
| $\text{MnSO}_4 \cdot 5\text{H}_2\text{O}$                           | myo-Inositol                  |
| $\text{NiCl}_2 \cdot 6\text{H}_2\text{O}$                           | Niacinamide                   |
| KCl                                                                 | D-Pantothenic acid • 1/2 Ca   |
| $\text{NaHCO}_3$                                                    | Pyridoxal • HCl               |
| NaCl                                                                | Riboflavin (B2)               |
| $\text{NaH}_2\text{PO}_4 \cdot \text{H}_2\text{O}$                  | Thiamine • HCl (B1)           |
| $\text{Na}_2\text{SeO}_3$                                           | Vitamin B12                   |
| Amino acids                                                         | DL- $\alpha$ Tocopherol       |
| L-Arginine • HCl                                                    | Lipids                        |
| L-Aspartic acid                                                     | Arachidonic acid              |
| L-Cysteine • HCl • $\text{H}_2\text{O}$                             | Cholesterol                   |
| L-Glutamic acid                                                     | Linoleic acid                 |
| L-Glutamine                                                         | Linolenic acid                |
| Glycine                                                             | Myristic acid                 |
| L-Histidine • HCl • $\text{H}_2\text{O}$                            | Oleic acid                    |
| L-Isoleucine                                                        | Palmitic acid                 |
| L-Leucine                                                           | Stearic acid                  |
| L-Lysine • HCl                                                      | Deoxyribonucleosides          |
| L-Methionine                                                        | Thymidine                     |
| L-Phenylalanine                                                     | Other components              |
| L-Proline                                                           | D-Glucose                     |
| L-Serine                                                            | Disodium succinate            |
| L-Threonine                                                         | HEPES                         |
| L-Tryptophan                                                        | Hypoxanthine                  |
| L-Tyrosine                                                          | Kolliphor P 188               |
| L-Valine                                                            | Polyvinylpyrrolidone K90      |
|                                                                     | Putrescine • 2HCl             |
|                                                                     | Sodium Pyruvate               |
|                                                                     | Succinic acid                 |
|                                                                     | Tween 80                      |
